# Supplementary material for: Understanding the photothermal heating effect in non-lamellar liquid crystalline systems, and the design of new mixed lipid systems for photothermal on-demand drug delivery
Source: Royal Society of Chemistry journal article supplement (doi:10.1039/c4cp03635b), 2014-10-17
Supplement: c4cp03635b1.pdf [file c4cp03635b1.pdf]

## Supporting Information

### Understanding the Photothermal Heating Effect in Non-lamellar Liquid Crystalline Systems, and the Design of New Mixed Lipid Systems for Photothermal On-Demand Drug Delivery

Wye-Khay Fong<sup>a</sup>, Tracey L. Hanley<sup>b</sup>, Benjamin Thierry<sup>c</sup>, Adam Tilley<sup>a</sup>, Nigel Kirby<sup>d</sup>, Lynne J. Waddington<sup>e</sup> and Ben J. Boyd<sup>\*.a,f</sup>

<sup>a</sup>Drug Delivery, Disposition and Dynamics, Monash Institute of Pharmaceutical Sciences, Monash University, 381 Royal Parade, Parkville, Victoria 3052, Australia, <sup>b</sup>Australian Nuclear Science and Technology Organisation, Menai, NSW 2234, Australia, <sup>c</sup>Ian Wark Research Institute, University of South Australia, Mawson Lakes, SA 5095, Australia, <sup>d</sup>SAXS/WAXS beamline, Australian Synchrotron, Clayton, Victoria, Australia, <sup>e</sup>CSIRO Materials Science and Engineering, 343 Royal Parade, Parkville, VIC 3052, Australia and <sup>f</sup>ARC Centre of Excellence in Convergent Bio-Nano Science and Technology, Monash Institute of Pharmaceutical Sciences, Monash University (Parkville Campus), 381 Royal Parade, Parkville, VIC 3052, Australia

\*Corresponding Author: [ben.boyd@monash.edu](mailto:ben.boyd@monash.edu)

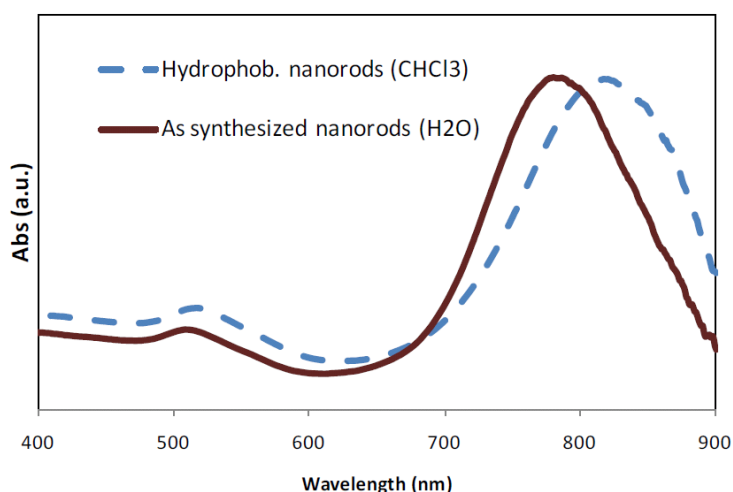

Figure S11 – Normalised absorption spectra of the ‘as synthesized’ gold nanorods. Solid line represents CTAB capping in H<sub>2</sub>O and dashed line the hydrophobized dodecanethiol GNR in CHCl<sub>3</sub>.

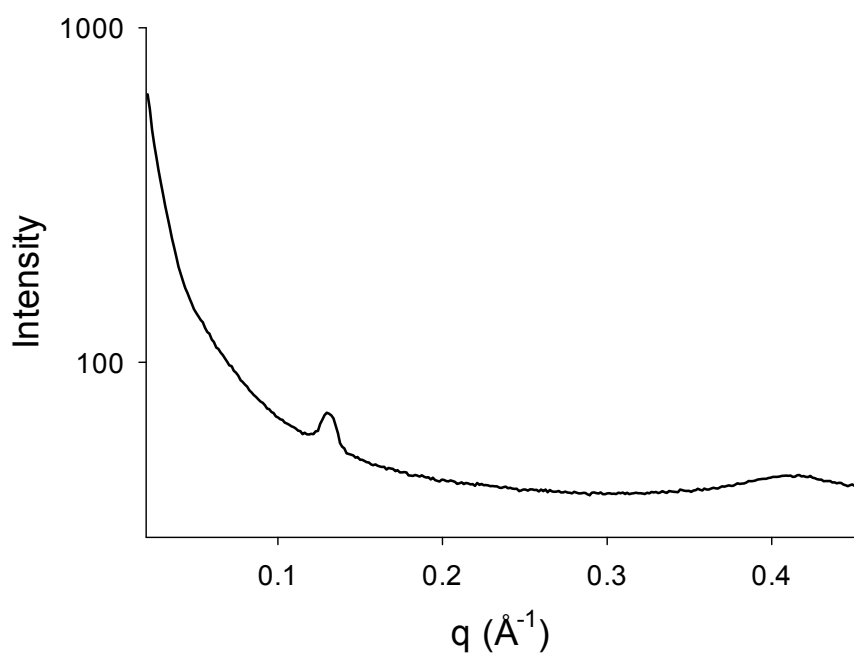

Figure SI2 – Representative SAXS pattern on monoelaidin + 3 nM GNR at temperatures between 62 – 70°C. The scattering at low  $q$  is attributed to the GNR in the sample. The broad peak at  $q = 0.45 \text{ \AA}^{-1}$  is attributed to Kapton, which was used to encase the sample.

PHYT only

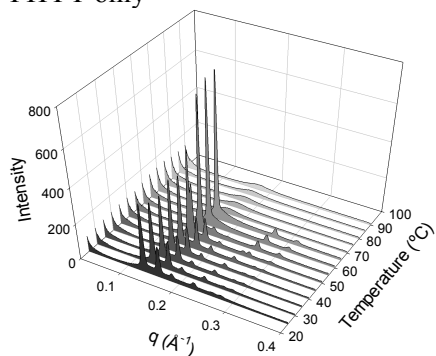

5.0 mol% DOPC

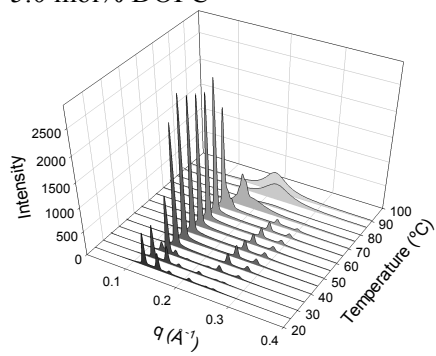

9.8 mol% DOPC

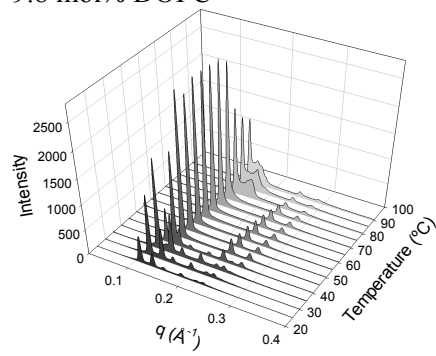

22.0 mol% DOPC

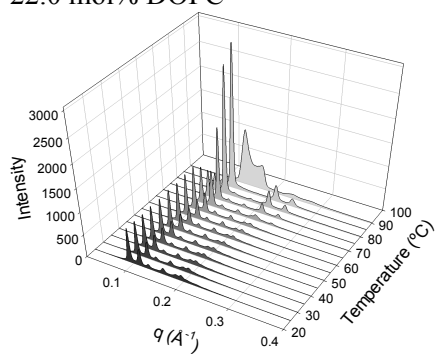

29.0 mol% DOPC

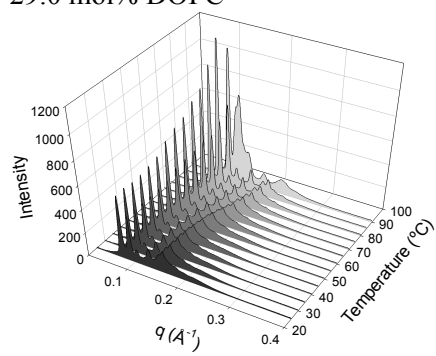

43.3 mol% DOPC

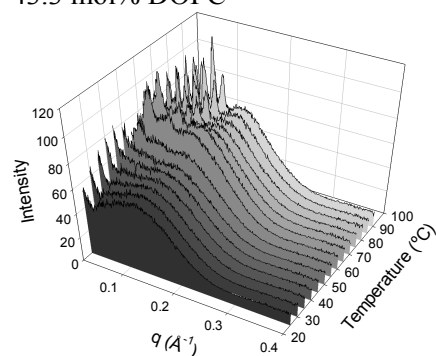

49.6 mol% DOPC

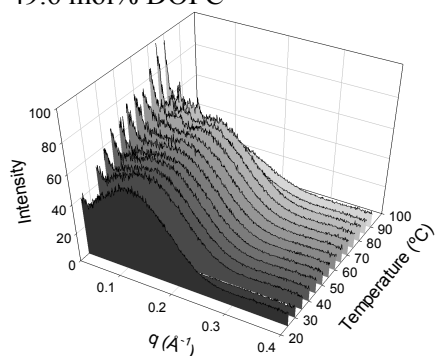

62.5 mol% DOPC

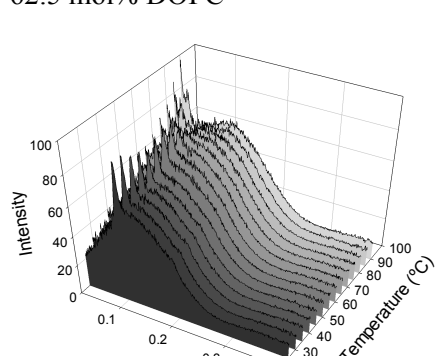

100% DOPC

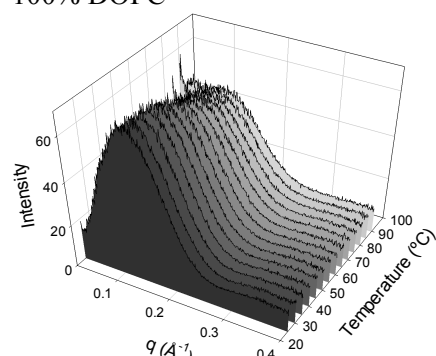

Figure S13 – Equilibrium SAXS scattering patterns displaying the effect of increasing amounts of DOPC addition on the thermal phase behaviour of PHYT matrices. The molar concentrations of DOPC addition into PHYT in each system are annotated on the graph. All matrices contain lipid mixture:MilliQ water 1:1 (w/w).

100% GMO

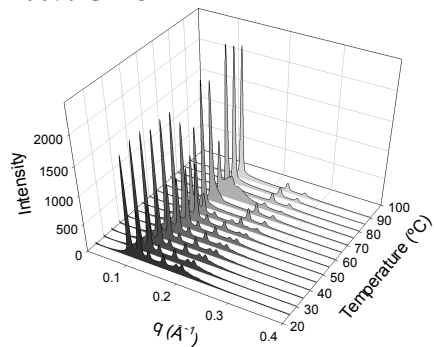

5.4 mol% DOPC

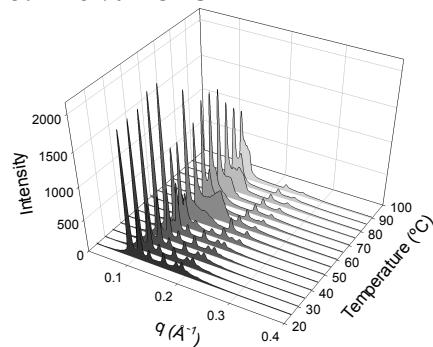

11.0 mol% DOPC

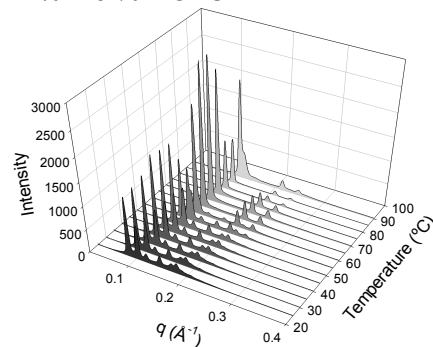

23.1 mol% DOPC

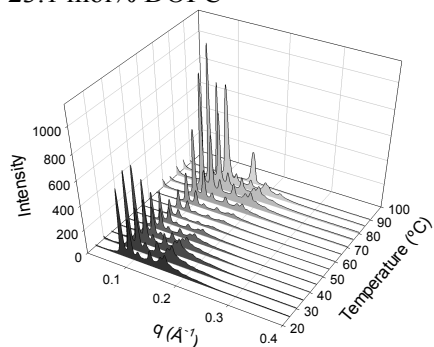

30.4 mol% DOPC

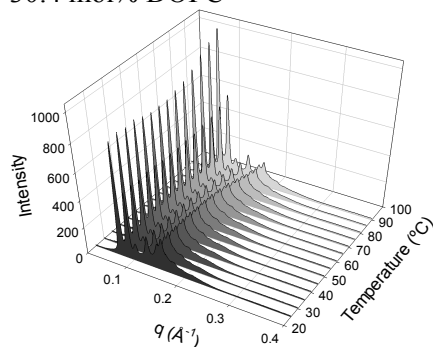

45.5 mol% DOPC

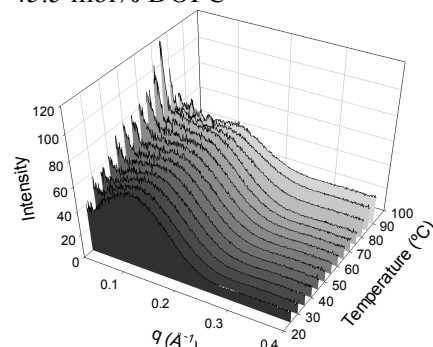

50.9 mol% DOPC

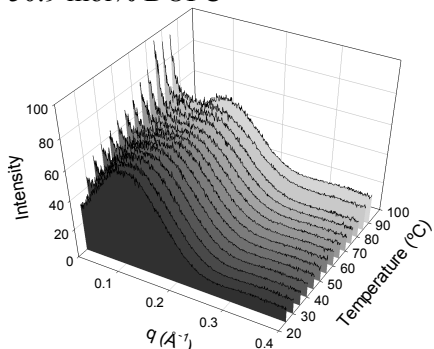

100% DOPC

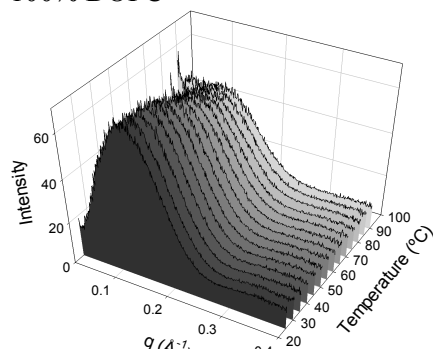

Figure SI4 – Equilibrium SAXS scattering patterns displaying the effect of increasing amounts of DOPC addition on the thermal phase behaviour of GMO matrices. All matrices contain lipid mixture: MilliQ water 1:1 (w/w).

100% PHYT

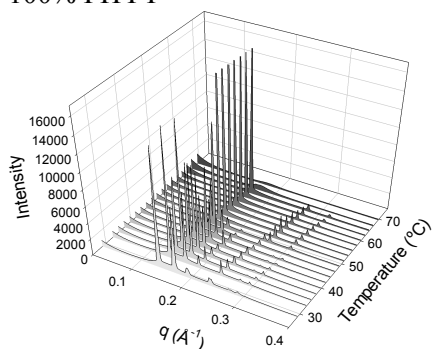

10.8

mol%

lysoPC

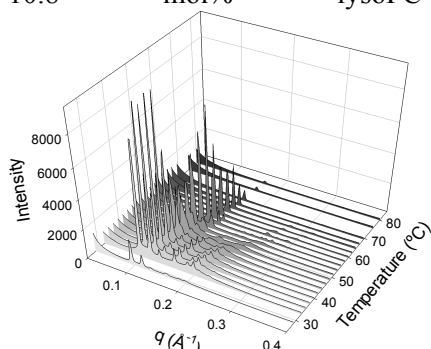

19.7 mol% lysoPC

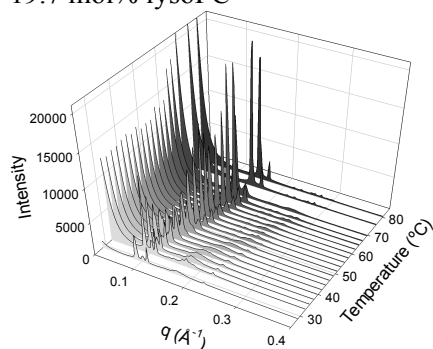

28.3 mol% lysoPC

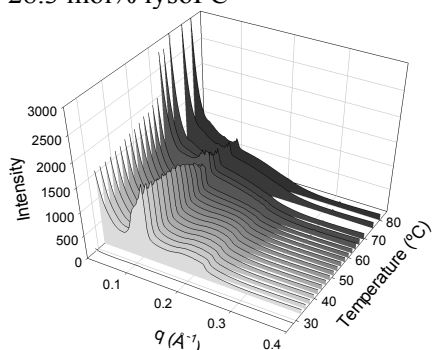

39.1 mol% lysoPC

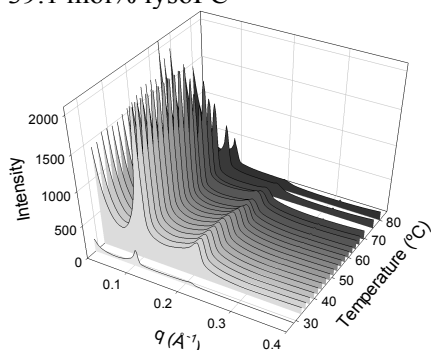

48.5 mol% lysoPC

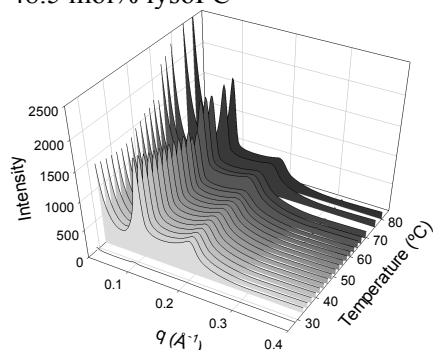

58.5 mol% lysoPC

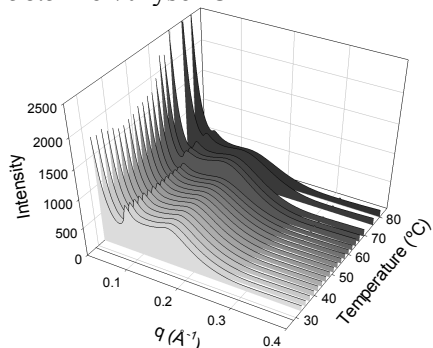

100% lysoPC

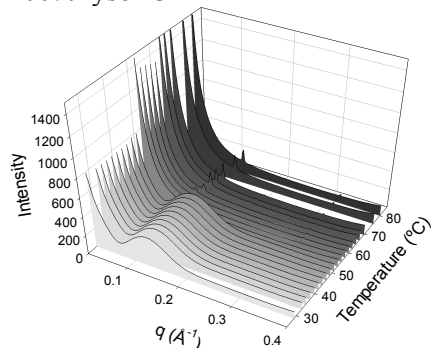

Figure S15 – Equilibrium SAXS scattering patterns displaying the effect of increasing amounts of LysoPC added to the PHYT cubic phase as determined by SAXS. All matrices contained 50% water (w/w).

GMO

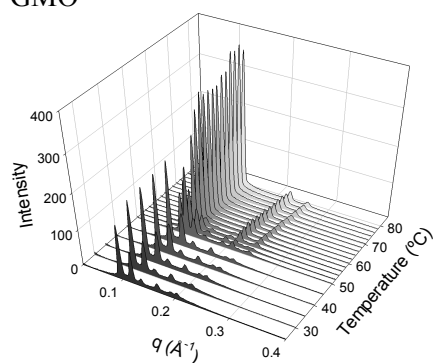

11.1 mol% lysoPC

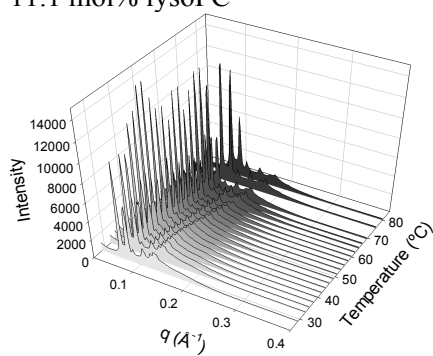

19.7 mol% lysoPC

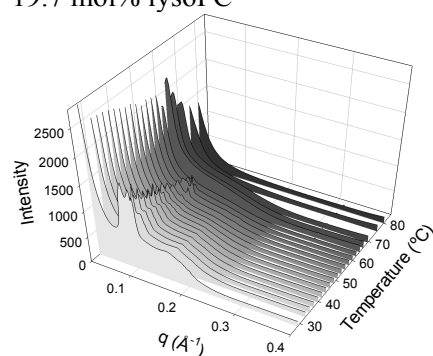

30.0 mol% lysoPC

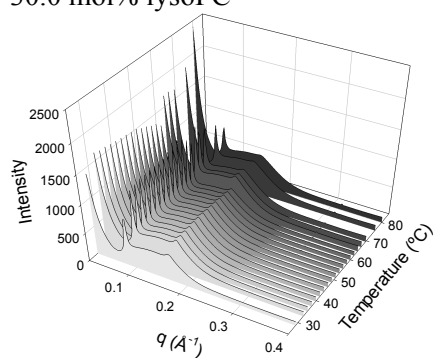

38.5 mol% lysoPC

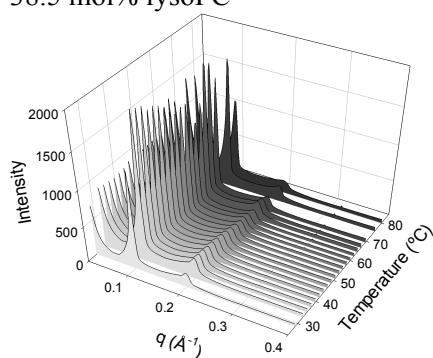

48.1 mol% lysoPC

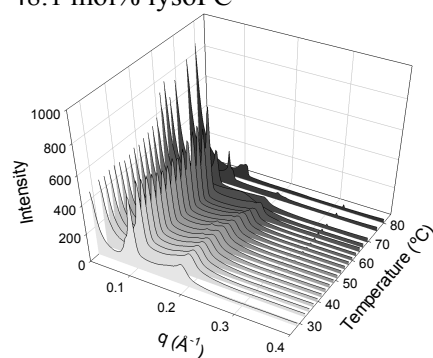

62.3 mol% lysoPC

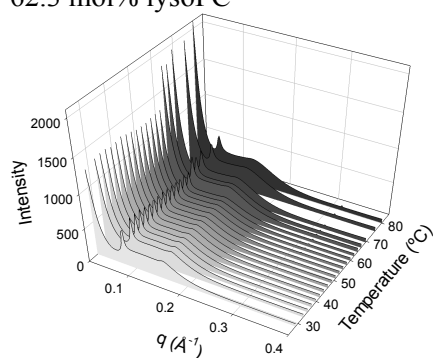

67.5 mol% lysoPC

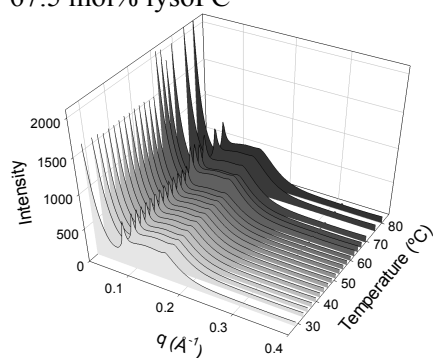

LysoPC

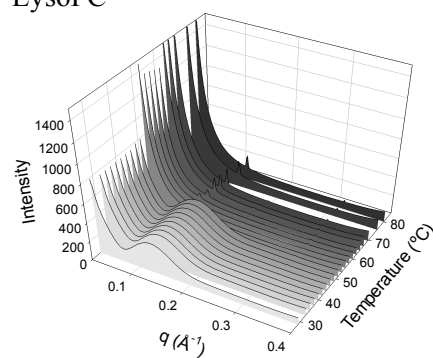

Figure SI6 – Equilibrium SAXS scattering patterns displaying the effect of increasing amounts of LysoPC on GMO as determined by SAXS. All matrices contained 50% water (w/w).

Equilibrium phase behaviour on heating  
 A. PHYT44DOPC, no GNR added

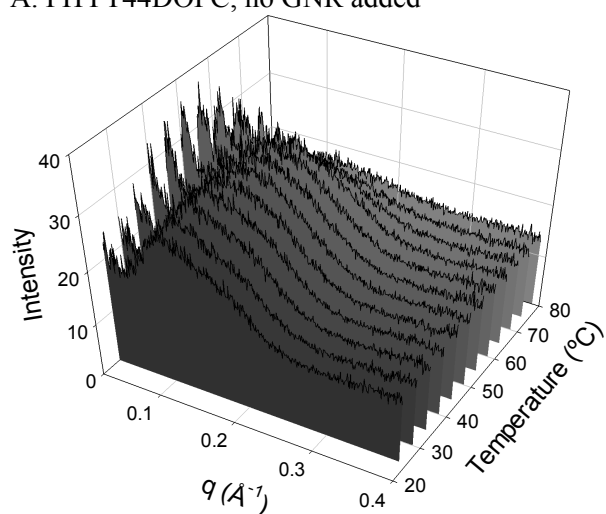

B. PHYT44DOPC + 3 nM GNR

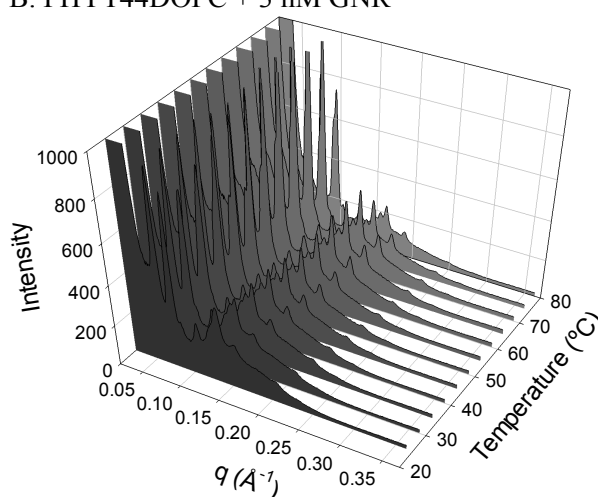

Kinetic phase behaviour on irradiation  
 C. PHYT44DOPC

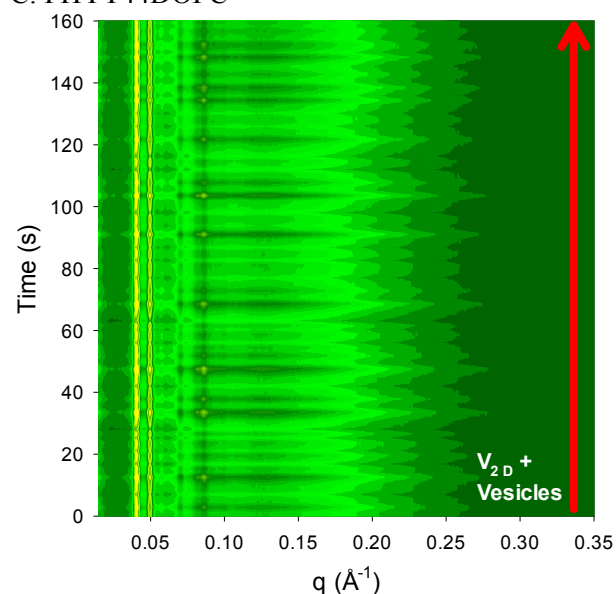

D. PHYT44DOPC-GNR

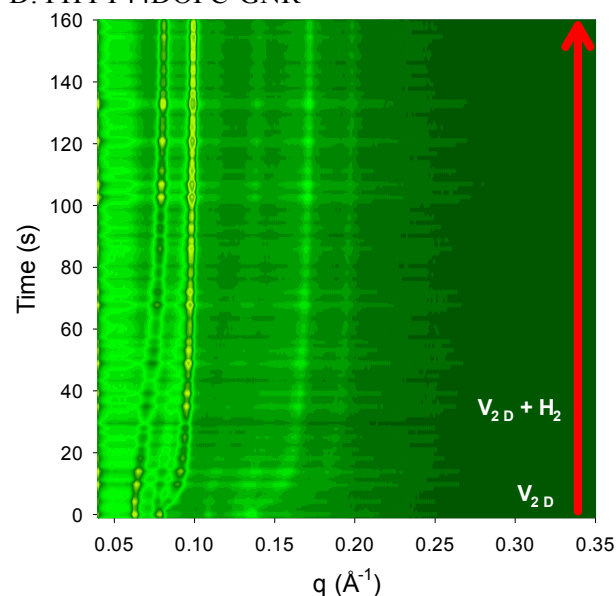

Figure SI7 – Panels A. and B.: The effect of GNR addition into the PHYT44DOPC matrix. SAXS profiles showing the equilibrium phase behaviour of Panel A. 44.4 mol% DOPC in PHYT (PHYT44DOPC) and Panel B. PHYT44DOPC + 3 nM GNR (PHYT44DOPC-GNR). Panels C. and D.: Time resolved SAXS profiles showing the effect of laser irradiation (810 nm, 586 mW) on the phase behaviour of PHYT44DOPC (Panel C.) and PHYT44DOPC-GNR (Panel D.). The phase transitions are annotated on the right and were determined by integration of the individual frames. The red arrow indicates the duration of NIR irradiation (160 s). All matrices are in 50% water. The increased intensity of yellow is indicative of increased scattering.

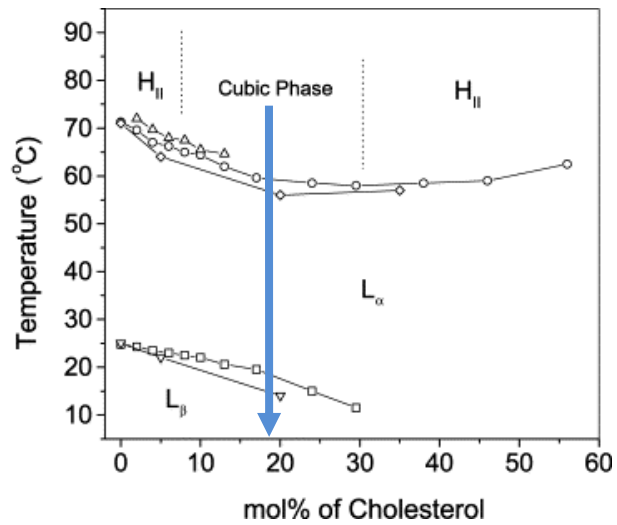

Figure SI8 – Partial phase diagram of aqueous dispersions of POPE and cholesterol. Symbols  $\nabla$  and  $\square$  indicate  $L_{\beta}$  to  $L_{\alpha}$  phase transitions;  $\diamond$ ,  $\circ$  and  $\triangle$  indicate lamellar to non-lamellar phase transition. The blue arrow indicates the POPE/cholesterol formulation (20.1 mol% cholesterol) chosen for the photothermal SAXS study. Adapted from <sup>1</sup>.

## References

1. X. Wang and P. J. Quinn, *Biochimica et Biophysica Acta (BBA) - Biomembranes*, 2002, **1564**, 66-72.
